# Supplementary material
Source: publisher figshare collection journal article supplement (https://diabetesjournals.figshare.com/articles/dataset/_/24449683)
Supplement: Supplementary file 1 [file 1]

**Supplemental Table 1: Major resource table**

| REAGENT or RESOURCE                                   | SOURCE                    | IDENTIFIER                       |
|-------------------------------------------------------|---------------------------|----------------------------------|
| <b>Antibodies</b>                                     |                           |                                  |
| Human/Mouse/Rat Activin A beta A subunit Antibody     | R&D                       | Cat#AF338; RRID: AB_355307       |
| Human/Mouse Follistatin Antibody                      | R&D                       | Cat#AF669; RRID: AB_2247223      |
| Anti-Gpnmab antibody                                  | R&D                       | Cat#AF2330; RRID: AB_2112934     |
| Anti-Smad2 antibody                                   | Cell Signaling Technology | Cat#5339; RRID: AB_10626777      |
| Anti-Smad3 antibody                                   | Cell Signaling Technology | Cat# 9513, RRID: AB_2286450      |
| Phospho Smad2 (Ser465/467) (138D4) Rabbit mAb         | Cell Signaling Technology | Cat# 3108, RRID: AB_490941       |
| Recombinant Anti-Smad3 (phospho S423 + S425) antibody | Abcam                     | Cat# ab52903, RRID: AB_882596    |
| Mouse CD36/SR-B3 Antibody                             | R&D                       | Cat# AF2519, RRID: AB_222876     |
| Human/Mouse/Rat FABP5/E-FABP Antibody                 | R&D                       | Cat# AF1476, RRID: AB_2293656    |
| Akt (pan) (C67E7) Rabbit mAb                          | Cell Signaling Technology | Cat# 4691, RRID: AB_915783       |
| Phospho-Akt (Ser473) (D9E) XP® Rabbit mAb             | Cell Signaling Technology | Cat# 4060, RRID: AB_2315049      |
| Phospho-S6 Ribosomal Protein (Ser235/236) Antibody    | Cell Signaling Technology | Cat# 2211, RRID: AB_331679       |
| S6 Ribosomal Protein (54D2) Mouse mAb                 | Cell Signaling Technology | Cat# 2317, RRID: AB_2238583      |
| Phospho-GSK-3β (Ser9) Antibody                        | Cell Signaling Technology | Cat# 9336, RRID: AB_331405       |
| GSK-3β (27C10) Rabbit mAb                             | Cell Signaling Technology | Cat# 9315, RRID: AB_490890       |
| Phospho-NF-κB p65 (Ser536) (93H1) Rabbit mAb          | Cell Signaling Technology | Cat# 3033, RRID: AB_331284       |
| Anti-NF-κB P65 antibody                               | Abcam                     | Cat# ab16502, RRID: AB_443394    |
| Phospho-p44/42 MAPK (Erk1/2) (Thr202/Tyr204)          | Cell Signaling Technology | Cat# 4370, RRID: AB_2315112      |
| p44/42 MAPK (Erk1/2) (L34F12) Mouse mAb               | Cell Signaling Technology | Cat# 4696, RRID: AB_390780       |
| Acetyl CoA Carboxylase (C83B10) Rabbit mAb (ACC)      | Cell Signaling Technology | Cat# 3676S, RRID: AB_2219397     |
| Fatty Acid Synthase Mouse antibody (FASN)             | BD Biosciences            | Cat# 610962, RRID: AB_398275     |
| p21 (F-5)                                             | Santa Cruz                | Cat# sc-6246, RRID: AB_628073    |
| FITC anti-CD45                                        | BioLegend                 | Cat# 103108, RRID: AB_312973     |
| PE anti-mouse CD45.2                                  | BioLegend                 | Cat# 109807, RRID: AB_313444     |
| PerCP-Cy5.5 anti-mouse Ly-6C                          | BioLegend                 | Cat# 128011, RRID: AB_1659242    |
| APC-Cy7 anti-mouse Ly-6G                              | BioLegend                 | Cat# 127623, RRID: AB_10645331   |
| PE-Cy7 anti-F4/80                                     | BioLegend                 | Cat# 123113, RRID: AB_893490     |
| APC anti-F4/80                                        | BioLegend                 | Cat# 123115, RRID: AB_893493     |
| APC anti-MHCII                                        | Thermo Fisher Scientific  | Cat# 17-5321-81, RRID: AB_469454 |
| BV510 anti-CD11b                                      | BioLegend                 | Cat# 101245, RRID: AB_2561390    |
| PE-Cy7 anti-CD11b                                     | BioLegend                 | Cat# 101215, RRID: AB_312798     |
| FITC anti-Trem2                                       | Thermo Fisher Scientific  | Cat# MA5-28223, RRID: AB_2745193 |
| PE anti-CD9                                           | BioLegend                 | Cat# 124805, RRID: AB_1279327    |
| PerCP/Cyanine5.5 anti-mouse CD11c                     | BioLegend                 | Cat# 117327, RRID: AB_2129642    |

|                                                                       |                          |                                |
|-----------------------------------------------------------------------|--------------------------|--------------------------------|
| Alexa Fluro 488 Rabbit-anti-Rat                                       | Thermo Fisher Scientific | Cat# A-21210, RRID: AB_2535796 |
| Alexa Fluro 568 Rabbit-anti-goat                                      | Thermo Fisher Scientific | Cat# A-11079, RRID: AB_2534123 |
| Alexa Fluro 647 Rabbit-anti-mouse                                     | Thermo Fisher Scientific | Cat# A-21239, RRID: AB_2535808 |
| <b>Bacterial and virus strains</b>                                    |                          |                                |
| NEB Stable Competent <i>E. coli</i>                                   | New England Biolabs      | C3040H                         |
| NEB®5-alpha Competent <i>E. coli</i>                                  | New England Biolabs      | C2987H                         |
| <b>Biological samples</b>                                             |                          |                                |
| None                                                                  |                          |                                |
| <b>Chemicals, peptides, and recombinant proteins</b>                  |                          |                                |
| Formalin solution                                                     | Sigma-Aldrich            | HT501128-4L                    |
| 20% Paraformaldehyde (formaldehyde) aqueous solution                  | Fisher Scientific        | 50-980-492                     |
| OptiPrep™ Density Gradient Medium                                     | Sigma-Aldrich            | D1556-250ML                    |
| cOmplete™ EDTA-free Protease Inhibitor Cocktail, mini-Tablets         | Sigma-Aldrich            | 11836170001                    |
| Halt™ Protease and Phosphatase Inhibitor Cocktail                     | Thermo Fisher Scientific | 78444                          |
| Fetal Bovine Serum                                                    | Thermo Fisher Scientific | 10437-028                      |
| Mini-PROTEAN® TGX™ Precast Protein Gels, 4-20%, 15-Well, 15 µL        | Bio-Rad                  | 4561096                        |
| Turbonuclease                                                         | Fisher Scientific        | NC0298896                      |
| Hematoxylin Solution, Harris Modified                                 | Sigma-Aldrich            | HHS16-500ML                    |
| TRIzol® Reagent                                                       | Thermo Fisher Scientific | 15596-018                      |
| RIPA/SDS buffer                                                       | Thermo Fisher Scientific | #89900                         |
| Molecular Probes FluoroPure DAPI                                      | Thermo Fisher Scientific | D21490                         |
| Hyaluronidase from bovine testes                                      | Sigma-Aldrich            | H3506-100MG                    |
| Collagenase, Type 1                                                   | Worthington Biochemical  | LS004196                       |
| Collagenase, Type 4                                                   | Worthington Biochemical  | LS004188                       |
| Deoxyribonuclease I bovine                                            | Sigma-Aldrich            | D5319-500UG                    |
| D- (+)-Glucose monohydrate                                            | Sigma-Aldrich            | 49159-1KG                      |
| D- (-)-Fructose,BioXtra                                               | Sigma-Aldrich            | F2543-1KG                      |
| D- (+)-Glucose,Hybri-Max™, powder, BioReagent, suitable for hybridoma | Sigma-Aldrich            | G5146-1KG                      |
| Sucrose, for molecular biology, ≥99.5% (GC)                           | Sigma-Aldrich            | S0389-5KG                      |
| Insulin solution human                                                | Sigma-Aldrich            | I9278-5ML                      |
| Xylenes                                                               | Sigma-Aldrich            | 534056-4L                      |
| RIPA Lysis and Extraction Buffer                                      | Sigma-Aldrich            | 89901                          |
| RBC Lysis Buffer (10X) 100 ml                                         | BioLegend                | 420301                         |
| Cholesterol-Water Soluble                                             | Sigma-Aldrich            | C4951                          |
| Palmitic acid                                                         | Sigma-Aldrich            | P0500                          |
| Oleic acid                                                            | Sigma-Aldrich            | O1383                          |

|                                                             |                                                              |                        |
|-------------------------------------------------------------|--------------------------------------------------------------|------------------------|
| Oxidized Low Density Lipoprotein from Human Plasma, (OxLDL) | Thermo Fisher Scientific                                     | L34357                 |
| Recombinant Mouse IFN-γ (carrier-free)                      | BioLegend                                                    | 575302                 |
| Lipopolysaccharides from Escherichia coli                   | Sigma-Aldrich                                                | L4391                  |
| Critical commercial assays                                  |                                                              |                        |
| PrimeScript™ RT Master Mix (Perfect Real Time)              | Takara Bio                                                   | RR036A                 |
| BCA assay kit                                               | Thermo Fisher Scientific                                     | #23227                 |
| ECL western blotting substrate                              | Thermo Fisher Scientific                                     | #32106                 |
| Picrosirius Red Stain Kit                                   | Polysciences                                                 | 24901-500              |
| Hydroxyproline Assay Kit                                    | BioVision                                                    | K555                   |
| Total Cholesterol kit                                       | Wako                                                         | 439-17501              |
| Triglyceride Colorimetric Assay Kit                         | Cayman                                                       | 10010303               |
| Free cholesterol Kit                                        | Wako                                                         | 994-02501              |
| Human/Mouse/Rat Activin A Quantikine ELISA Kit              | R&D                                                          | DAC00B                 |
| Human Follistatin Quantikine ELISA Kit                      | R&D                                                          | DFN00                  |
| Mouse Osteoactivin/GPNMB DuoSet ELISA                       | R&D                                                          | DY2330                 |
| AST/GOT LIQUID(KINETIC) Kit                                 | Teco Diagnostics                                             | A559150                |
| ALT/SGPT COLOR ENDPOINT Kit                                 | Teco Diagnostics                                             | A526120                |
| Senescence Cells Histochemical Staining Kit                 | Sigma-Aldrich                                                | CS0030                 |
| Deposited data                                              |                                                              |                        |
| RNA-seq                                                     | NCBI GEO database                                            | GSE221443              |
| Experimental models: Cell lines                             |                                                              |                        |
| Hepa 1-6                                                    | ATCC                                                         | CRL1830 (lot#70031235) |
| L929                                                        | ATCC                                                         | CCL-1(lot# 70026472)   |
| Experimental models: Organisms/strains                      |                                                              |                        |
| Mouse: C57BL/6J                                             | The Jackson Laboratory                                       | 000664 age: 8–10 wks   |
| Oligonucleotides                                            |                                                              |                        |
| See supplemental Table 1 for RT primer                      |                                                              |                        |
| AAV8-shRNA SC                                               | 5'CACCACCTAAGGTTAAGTCGCCCTCGCTCGAGCGAGGGCGAC TTAACCTTAGG-3', |                        |
| AAV8-shRNA Gpnmb                                            | 5'CACCAGGAGCTTTGTCTACGTCTTTCCTCGAGGAAAGACGTAG ACAAAGCTCC-3', |                        |
| AAV8-shRNA Activin A                                        | 5'CACCACCTTCCACTCAACAGTCATTACTCGAGTAATGACTGTTG AGTGGAAGG-3'  |                        |
| Recombinant DNA                                             |                                                              |                        |
| AAV8-TBG-GFP                                                | This paper                                                   | N/A                    |
| AAV8-TBG-Activin A                                          | This paper                                                   | N/A                    |
| AAV8- RSV-GFP-H1                                            | Gifted by Dr. Ira Tabas                                      | N/A                    |
| AAV8-shRNA SC                                               | This paper                                                   | N/A                    |
| AAV8-shRNA Gpnmb                                            | This paper                                                   | N/A                    |

|                                       |                    |                                                                                   |
|---------------------------------------|--------------------|-----------------------------------------------------------------------------------|
| AAV8-shRNA Activin A                  | This paper         | N/A                                                                               |
| <b>Software and algorithms</b>        |                    |                                                                                   |
| ImageJ/Fiji                           | This paper         | <a href="https://imagej.net/software/fiji/">https://imagej.net/software/fiji/</a> |
| PRISM GraphPad                        | Version 8          | N/A                                                                               |
| Flow Jo                               | Version.10.8.0     | <a href="https://www.flowjo.com/">https://www.flowjo.com/</a>                     |
| Image studio                          | Version 5.2        | N/A                                                                               |
| R version 4.0.5                       | R Core Team        | <a href="https://www.R-project.org/">https://www.R-project.org/</a>               |
| RStudio                               | RStudio Team       | <a href="http://www.rstudio.com">http://www.rstudio.com</a>                       |
| R package DESeq2                      | Version1.30.00     | N/A                                                                               |
| R package ggplot2                     | Version 3.3.5.9000 | N/A                                                                               |
| R package ClusterProfiler             | Version 3.8        | N/A                                                                               |
| R package Heatmap                     | Version1.0.12      | N/A                                                                               |
| R package stats                       | Version 3.6.2      | N/A                                                                               |
| R package ggvenn                      | Version 0.1.9      | N/A                                                                               |
| <b>Other</b>                          |                    |                                                                                   |
| AAV8-TBG-GFP virus                    | This paper         | Customized                                                                        |
| AAV8-TBG-Activin A virus              | This paper         | Customized                                                                        |
| AAV8-H1-shRNA SC virus                | This paper         | Customized                                                                        |
| AAV8-H1-shRNA Gpnmb virus             | This paper         | Customized                                                                        |
| AAV8-H1-shRNA Activin A virus         | This paper         | Customized                                                                        |
| Standard laboratory diet              | Pro-lab            | irradiated Prolab Isopro RMH 3000                                                 |
| MASH (NASH) diet                      | Envigo             | TD.160785                                                                         |
| BG1000 Blood Glucose Meter and Strips | Clarity            | CD-BG5                                                                            |

**Supplemental Table 2: RT-PCR primers for mice**

| <b>Primer name</b> | <b>Primer sequence</b>  |
|--------------------|-------------------------|
| mHRPT-RT-F         | ACTGTAATGATCAGTCAACGGG  |
| mHRPT-RT-R         | GGCCTGTATCCAACACTTCG    |
| Activin A-RT-F     | ACGACATTGGCAGGAGG       |
| Activin A-RT-R     | GCTGAAATAGACGGATGGTG    |
| Col1a1-RT- F       | GCTCCTCTTAGGGGCCACT     |
| Col1a1-RT- R       | CCACGTCTCACCATTGGGG     |
| Col1a2-RT- F       | GTAACCTTCGTGCCTAGCAACA  |
| Col1a2-RT- R       | CCTTTGTCAGAATACTGAGCAGC |
| Col3a1-RT-F        | CTGTAACATGGAACTGGGGAAA  |
| Col3a1-RT- R       | CCATAGCTGAACTGAAAACCACC |
| Srebp2-RT-F        | CCAAAGAAGGAGAGAGGCGG    |
| Srebp2-RT-R        | CGCCAGACTTGTGCATCTTG    |
| Srebp1-RT-F        | CAAGGCCATCGACTACATCCG   |
| Srebp1-RT-R        | CACCACTTCGGGTTTCATGC    |
| FST-RT-F           | TGCTGCTACTCTGCCAGTT     |
| FST-RT-R           | CAACACTCTTCCTTGCTCAGT   |
| ACVR1a-RT-F        | GGCTGCTTTCAGGTTTATGA    |
| ACVR1a-RT-R        | GGACTTCCCTTTAGTGGGC     |

|                     |                            |
|---------------------|----------------------------|
| ACVR1b-RT-F         | CGTCTTCCTGGTCATCAACTAT     |
| ACVR1b-RT-R         | GCGTCTTGTCTTTGGAGAGA       |
| ACVR1c-RT-F         | CAAGGTAAGCCTGCTATTGC       |
| ACVR1c-RT-R         | GGTTCCCACTTTAGGATTCTG      |
| Acta2-RT- F         | ATGCTCCCAGGGCTGTTTTCCCAT   |
| Acta2-RT- R         | GTGGTGCCAGATCTTTTCCATGTCTG |
| Tnf $\alpha$ -RT- F | CTTCTGTCTACTGAACTTCGGG     |
| Tnf $\alpha$ -RT-R  | CAGGCTTGTCACTCGAATTTTG     |
| Mcp1/CCL2-RT-F      | TTAAAAACCTGGATCGGAACCAA    |
| Mcp1/CCL2-RT-R      | GCATTAGCTTCAGATTTACGGGT    |
| CCL3-RT-F           | TGTACCATGACACTCTGCAAC      |
| CCL3-RT-R           | CAACGATGAATTGGCGTGGA       |
| CCL4-RT-F           | AAACCTAACCCCGAGCAACA       |
| CCL4-RT-R           | CCATTGGTGCTGAGAACCCT       |
| CCL5-RT-F           | TGCCCACGTCAAGGAGTATTT      |
| CCL5-RT-R           | TCCTAGCTCATCTCCAAATAGTTGAT |
| Ccl6-RT-F           | AAGAAGATCGTCGCTATAACCCT    |
| Ccl6-RT-R           | GCTTAGGCACCTCTGAACTCTC     |
| CCL7-RT-F           | CTGTGCCTGCTGCTCATA         |
| CCL7-RT-R           | AGGGACACCGACTACTGGT        |
| CCL9-RT-F           | CCCTCTCCTTCCTCATTCTTACA    |
| CCL9-RT-R           | AGTCTTGAAAGCCCATGTGAAA     |
| Ccl22-RT-F267       | CAGGCAGGTCTGGGTGAA         |
| Ccl22-RT-R413       | TAAAGGTGGCGTCGTTGG         |
| CCR1-RT-F144        | AGTGGTGGGCAATGTCCT         |
| CCR1-RT-R292        | CGTCTTTCAACTTGTAGTCAATCC   |
| CCR2-RT-F           | TGTGGGACAGAGGAAGTGG        |
| CCR2-RT-R           | GGAGGCAGAAAATAGCAGCA       |
| CXCL1-RT-F          | GGCTGGGATTACCTCAA          |
| CXCL1-RT-R          | GCTTCAGGGTCAAGGCAA         |
| CXCL9-RT-F          | TCCTCTTGGGCATCATCTTCC      |
| CXCL9-RT-R          | TTGTAGTGGATCGTGCCTCG       |
| CXCL10-RT-F         | TGCTGGGTCTGAGTGGGACT       |
| CXCL10-RT-R         | AGGATAGGCTCGCAGGGATG       |
| Cxcr4-RT-280        | CCCTTCTGGGCAGTTGAT         |
| Cxcr4-RT-433        | TGGTGGCGTGGACAATAG         |
| CD68-RT-F           | ACCACAAATGGCACTGCT         |
| CD68-RT-R           | CTGAACACAAGGCTGGGA         |
| Lgals3-RT-F         | AACACGAAGCAGGACAATAACTGG   |
| Lgals3-RT-R         | GCAGTAGGTGAGCATCGTTGAC     |
| Mpeg1-RT-F181       | CGGGTGATGGACTTGACA         |
| Mpeg1-RT-R361       | GGGCGAGTTCTGTGTTGA         |
| TLR1-RT-F           | TCAGCACTACGATCGGTTTG       |

|                    |                         |
|--------------------|-------------------------|
| TLR1-RT-R          | TGTTTCCACATTGTTTCAGGG   |
| TLR2-RT-F          | GCGACATCCATCACCTG       |
| TLR2-RT-R          | TCATCTACGGGCAGTGG       |
| TLR13-RT-F1511     | TTCGGACTCTCAACCACG      |
| TLR13-RT-R1644     | CATCAGGTCAAGGGAACG      |
| ITGB2-RT-F662      | TCGGCAAGCAACTGATTT      |
| ITGB2-RT-R796      | CATCGTCTGTGGCAAACA      |
| ITGAX-RT-F365      | TGACAGGGCTCTGCTTTC      |
| ITGAX-RT-R495      | GGAAGTATGCTACCCGA       |
| Ly6D-RT-F          | ATGCAACGAGAGGCTGGTCA    |
| Ly6D-RT-R          | ACTAGAAGGGAAGGGGCAAG    |
| Lyz2-RT-F          | TGTGAATGCCTGTGGGA       |
| Lyz2-RT-R          | AGACTCCGCAGTTCCGA       |
| Fcgr1-RT-F         | ACCTGAGTCACAGCGGCATCTA  |
| Fcgr1-RT-R         | TGACACGGATGCTCTCAGCACT  |
| Irf5-RT-F          | CCTACAGAACCACTCTTGCCTG  |
| Irf5-RT-R          | CCTTGTGGGTTGCTGATGGTGA  |
| Irf7-RT-F          | GAGTTTCGGGCTCGGAG       |
| Irf7-RT-R          | GGACACACCCTCACGCT       |
| Lcn2-RT-F276       | ATGTCACCTCCATCCTGGTCAG  |
| Lcn2-RT-R420       | GCCACTTGCACATTGTAGCTCTG |
| H2-Ab1-RT-F39      | TGTGGTGGTGCTGATGGT      |
| H2-Ab1-RT-R144     | CGTCCCGTTGGTGAAGTA      |
| H2-Eb1-RT-F        | GCGGAGAGTTGAGCCTACG     |
| H2-Eb1-RT-R        | CCAGGAGGTTGTGGTGTTC     |
| H2-Aa-RT-F         | TCAGTCGCAGACGGTGTTCAT   |
| H2-Aa-RT-R         | GGGGGCTGGAATCTCAGGT     |
| IL-1 $\beta$ -RT-F | TGCCACCTTTTGACAGTGATG   |
| IL-1 $\beta$ -RT-R | TGATGTGCTGCTGCGAGATT    |
| Fabp3-RT-F247      | AGAGTTCGACGAGGTGACAGCA  |
| Fabp3-RT-R350      | TTGTCTCCTGCCCGTTCCACTT  |
| Fabp4-RT-F64       | AAAGAAGTGGGAGTGGGC      |
| Fabp4-RT-R234      | GTCGTCTGCGGTGATTTC      |
| Fabp5-RT-F         | GCCTGATGGAAAGCCAC       |
| Fabp5-RT-R         | CCGTGATGTTGTTGCCA       |
| Cd36-RT-F          | CGTGGCAAAGAACAGCA       |
| Cd36-RT-R          | GGCTCAAAGATGGCTCC       |
| Gpnmb-RT-F         | AGAAATGGAGCTTTGTCTACGTC |
| Gpnmb-RT-R         | CTTCGAGATGGGAATGTATGCC  |
| TREM2-RT-F         | ATGCCAGCGTGTGGTGA       |
| TREM2-RT-R         | GACGGTTCCAGCAAGGG       |
| CD9-RT-F           | TGCTGGGATTGTTCTTCGGG    |
| CD9-RT-R           | GCTTTGAGTGTTTCCCGCTG    |

|                     |                        |
|---------------------|------------------------|
| Mmp12-RT-F          | TTTGATGAGGCAGAAACGTG   |
| Mmp12-RT-R          | AGAGAGGCGAAATGTGCT     |
| Adgre1 (F4/80)-RT-F | ACCACAATACCTACATGCACC  |
| Adgre1 (F4/80)-RT-R | AAGCAGGCGAGGAAAAGATAG  |
| Timp1-RT-F          | CCAGAACCGCAGTGAAGAG    |
| Timp1-RT-R          | CTCCAGTTTGCAAGGGATAGA  |
| Cidec-RT-F          | TCGTGTTAGCACCGCAGA     |
| Cidec-RT-R          | ATCTTCCTCCAGCACCGAG    |
| mCdkn2a (p16)-RT-F  | GCTCAACTACGGTGCAGATTC  |
| mCdkn2a (p16)-RT-R  | GCACGATGTCTTGATGTCCC   |
| mCdkn1a (p21)-RT-F  | CGAGAACGGTGGAACCTTGAC  |
| mCdkn1a (p21)-RT-R  | CCAGGGCTCAGGTAGACCTT   |
| mTp53-RT-F          | ATCGCCTTCGACATCATCGC   |
| mTp53-RT-R          | CCCCATGCGTACTCCATGAG   |
| mGlb1 (β-gal)-RT-F  | CTGCCCAAGATGAAGCC      |
| mGlb1 (β-gal)-RT-R  | CCCAGATGGTAGCGGAA      |
| mBasp1-RT-F         | GCGAGGCCAAAAAGACTGAG   |
| mBasp1-RT-R         | CCGCGCTGCTAGGTTTAGAG   |
| mNrg1-RT-F          | CTGTTGGTGGTCGGCAT      |
| mNrg1-RT-R          | CTGGTGGTGGGTTTGGA      |
| mSirpa-RT-F         | GGCGTGTGCTTTGCTCGTA    |
| mSirpa-RT-R         | TTCCCTGGCGTTCTTCTCG    |
| mPlau-RT-F          | CCTGGTTCGCAGCCATCTA    |
| mPlau-RT-R          | TTCTTTGGGAGTTGAATGAAGC |
| mSh3bgrl3-RT-F      | AGGTGACCCGCATCCTA      |
| mSh3bgrl3-RT-R      | GGTTGCCAGCCAAGGTT      |
| mCol5a2-RT-F        | GGGTTTCCTGGTTCTGC      |
| mCol5a2-RT-R        | TATCTCCCACTCGCCCA      |
| mCD14-RT-F          | TGTGCTCGGGATTTCCG      |
| mCD14-RT-R          | CCTTGTTGCCACGACA       |

**Supplemental Table 3: SASP genes (total 105) upregulated by sugar water-FPC diet.**

| Gene name | Average FPC | Average Chow | log2FoldChange | padj     |
|-----------|-------------|--------------|----------------|----------|
| Lgals3    | 496.968585  | 40.91124193  | 3.609664214    | 1.55E-33 |
| Anxa2     | 1820.02561  | 200.2442981  | 3.187112509    | 1.27E-28 |
| Mmp12     | 355.429392  | 2.396829861  | 7.247920265    | 6.56E-27 |
| Vcam1     | 775.527679  | 147.9749437  | 2.390227635    | 2.72E-26 |
| Sirpa     | 919.024931  | 197.5873283  | 2.221002503    | 1.47E-24 |
| Iqgap1    | 638.754635  | 134.2496268  | 2.254459663    | 3.06E-21 |
| Colla1    | 939.2413    | 152.051837   | 2.627480957    | 1.80E-20 |
| Gpc1      | 911.721751  | 151.0373937  | 2.591989118    | 2.88E-20 |
| Axl       | 964.60582   | 256.1653195  | 1.915632291    | 4.46E-18 |
| S100a11   | 608.356566  | 78.20409487  | 2.961524027    | 3.43E-17 |

|          |            |             |             |          |
|----------|------------|-------------|-------------|----------|
| Anxa5    | 5348.85508 | 1354.385265 | 1.981993435 | 6.15E-17 |
| H2ab1    | 1558.59665 | 368.18867   | 2.082620886 | 7.14E-17 |
| Col1a2   | 975.026019 | 227.5969463 | 2.098430678 | 4.77E-16 |
| Col3a1   | 2411.31953 | 568.4390015 | 2.084945518 | 7.15E-16 |
| Ccdc80   | 571.382764 | 116.6685525 | 2.297631849 | 2.51E-15 |
| Nid1     | 907.096429 | 210.1295084 | 2.11134147  | 9.86E-15 |
| Serpine1 | 189.805535 | 23.81718436 | 3.016618995 | 2.28E-13 |
| Nrg1     | 103.942685 | 7.190489583 | 3.879501289 | 1.29E-12 |
| App      | 2425.12614 | 942.2162719 | 1.364595557 | 2.30E-12 |
| Vim      | 952.145481 | 349.9703194 | 1.445083199 | 9.15E-12 |
| Msn      | 924.892786 | 313.0445071 | 1.565408848 | 2.01E-11 |
| Csflr    | 1310.69507 | 446.323384  | 1.555633182 | 1.44E-10 |
| Igfbp1   | 4736.46179 | 1605.310524 | 1.560850619 | 1.94E-10 |
| Lgals1   | 1105.77121 | 280.3305792 | 1.982005197 | 2.42E-10 |
| Spp1     | 3159.50953 | 885.8562375 | 1.834459521 | 3.67E-10 |
| Cd44     | 337.783139 | 75.56923864 | 2.168439465 | 3.68E-10 |
| Lum      | 453.295502 | 130.8494725 | 1.79044614  | 1.46E-09 |
| Pkm      | 708.085126 | 271.7155223 | 1.383808267 | 1.68E-09 |
| Mmp13    | 64.1039457 | 2.26475954  | 4.790272523 | 5.92E-09 |
| Mmp7     | 103.957541 | 0.346638924 | 7.9534031   | 2.01E-08 |
| Cxcl16   | 256.831781 | 82.11121247 | 1.640696266 | 2.55E-08 |
| Col14a1  | 1764.57713 | 779.3936442 | 1.17962364  | 3.20E-08 |
| Dkk3     | 126.555475 | 27.07228864 | 2.228816588 | 3.22E-08 |
| Tmsb4x   | 3252.49542 | 1195.180099 | 1.444487633 | 3.32E-08 |
| Thbs2    | 182.142209 | 48.41455869 | 1.91423136  | 5.58E-08 |
| Flna     | 1177.81875 | 469.4477321 | 1.328773361 | 5.68E-08 |
| Il1rn    | 176.3138   | 36.57382616 | 2.281814322 | 7.95E-08 |
| Mfge8    | 482.15717  | 183.0861454 | 1.398557092 | 7.97E-08 |
| Thbs1    | 141.650714 | 28.02656122 | 2.351858249 | 1.36E-07 |
| Tagln2   | 562.780516 | 193.7357092 | 1.539662587 | 1.43E-07 |
| Col4a1   | 1854.82783 | 798.8465063 | 1.214958985 | 1.57E-07 |
| Postn    | 363.160364 | 108.9358993 | 1.742225467 | 1.58E-07 |
| Selplg   | 104.618957 | 23.40835901 | 2.162483698 | 3.79E-07 |
| Tgfb1    | 286.158396 | 104.7508657 | 1.455574715 | 3.88E-07 |
| Sparc    | 1840.02882 | 757.6394928 | 1.280981552 | 7.40E-07 |
| Fstl1    | 302.094441 | 107.8466552 | 1.486315376 | 9.59E-07 |
| Cd14     | 181.354602 | 48.09985354 | 1.915839722 | 1.06E-06 |
| Loxl2    | 128.436223 | 32.1280733  | 2.004752569 | 1.13E-06 |
| Mmp2     | 183.397914 | 53.60696524 | 1.768643432 | 1.57E-06 |
| Cd9      | 604.806731 | 243.6707127 | 1.311567654 | 2.14E-06 |
| Timp2    | 588.306458 | 252.7498772 | 1.220494364 | 3.14E-06 |
| Bgn      | 2653.53367 | 1315.392187 | 1.01270203  | 3.80E-06 |
| Col5a1   | 348.486198 | 150.6705807 | 1.210872059 | 9.93E-06 |



|          |            |             |             |          |
|----------|------------|-------------|-------------|----------|
| Emilin1  | 650.665146 | 324.3631603 | 1.003680379 | 1.15E-05 |
| Baspl    | 101.869631 | 23.17676219 | 2.156644543 | 1.59E-05 |
| Hspb1    | 1469.60553 | 609.6970953 | 1.270384562 | 2.31E-05 |
| Ccl2     | 45.2491196 | 5.587349579 | 3.037914429 | 2.69E-05 |
| Jun      | 1667.5514  | 833.4013094 | 1.001733146 | 2.85E-05 |
| Man1c1   | 114.303537 | 36.35321044 | 1.654501137 | 2.94E-05 |
| Csrp1    | 384.66847  | 165.0657176 | 1.221384562 | 4.02E-05 |
| Col5a2   | 206.040669 | 61.98065064 | 1.737153914 | 4.14E-05 |
| Cx3cl1   | 61.3394271 | 10.40535257 | 2.556510889 | 5.19E-05 |
| Ehd2     | 209.697231 | 68.87233309 | 1.610396121 | 5.22E-05 |
| Csf2rb   | 249.522169 | 96.46470246 | 1.370664494 | 5.68E-05 |
| Gsn      | 992.850142 | 448.7675289 | 1.144947288 | 6.36E-05 |
| Cxcl9    | 280.651716 | 95.26042993 | 1.567214566 | 8.91E-05 |
| Ccl5     | 53.1524676 | 9.059038161 | 2.530726566 | 9.06E-05 |
| Fscn1    | 139.787242 | 44.22651693 | 1.66417866  | 0.000118 |
| Anxa1    | 175.336655 | 68.65246515 | 1.358862477 | 0.000124 |
| Efemp2   | 123.975922 | 43.29545741 | 1.520866329 | 0.000134 |
| Spon2    | 416.974814 | 193.9997428 | 1.105542423 | 0.000141 |
| Fbln2    | 113.394265 | 33.68365697 | 1.756513007 | 0.00019  |
| Lamc1    | 607.192268 | 289.3611504 | 1.069588366 | 0.000195 |
| Col6a3   | 466.35591  | 198.3736723 | 1.233952787 | 0.000233 |
| Col6a2   | 244.908338 | 104.3972942 | 1.229941056 | 0.000287 |
| Rps6ka1  | 478.624674 | 227.3712896 | 1.076078927 | 0.0003   |
| Pgm1     | 156.78673  | 63.49552071 | 1.302903191 | 0.000315 |
| Esm1     | 58.8836737 | 8.645798976 | 2.776193742 | 0.000315 |
| Col16a1  | 154.534454 | 65.32457577 | 1.247325094 | 0.000336 |
| Fbn1     | 161.855288 | 58.87188143 | 1.455550556 | 0.000356 |
| Gdf15    | 1029.22083 | 435.8511581 | 1.240690464 | 0.000363 |
| Sh3bgrl3 | 217.299337 | 95.19205866 | 1.196575602 | 0.000598 |
| Ube2c    | 42.5117253 | 5.119239015 | 3.061263874 | 0.000609 |
| Hexb     | 234.271971 | 110.1612315 | 1.083414934 | 0.000615 |
| Loxl1    | 133.158312 | 46.82000166 | 1.506806825 | 0.000634 |
| Tnc      | 78.5732237 | 21.97424698 | 1.845364639 | 0.000785 |
| Sema3f   | 206.803528 | 95.91296342 | 1.112422976 | 0.000789 |
| Areg     | 13.9826938 | 0           | 6.017166569 | 0.001023 |
| Pamr1    | 153.433465 | 66.11724239 | 1.212937267 | 0.001035 |
| Bcl2     | 69.4496118 | 19.93995407 | 1.804447111 | 0.001118 |
| Lama5    | 158.899644 | 66.31591297 | 1.257482059 | 0.001197 |
| Ltbp3    | 134.772575 | 51.19826877 | 1.396852452 | 0.001256 |
| Tpm4     | 731.693561 | 356.8356258 | 1.038216637 | 0.001596 |
| Col12a1  | 130.924175 | 47.33327043 | 1.479115675 | 0.00232  |
| Htra1    | 104.463357 | 33.95839629 | 1.626128158 | 0.002917 |
| S100a6   | 80.6907768 | 27.06182769 | 1.579336426 | 0.003106 |

|        |            |             |             |          |
|--------|------------|-------------|-------------|----------|
| Mrc2   | 134.257963 | 49.81195777 | 1.419663865 | 0.00316  |
| Plat   | 66.4182316 | 21.12568575 | 1.648531646 | 0.003406 |
| Ckap4  | 102.099805 | 38.60938701 | 1.409398394 | 0.004101 |
| Plaur  | 41.2853639 | 9.360136455 | 2.146254107 | 0.005009 |
| Ccl22  | 14.7463859 | 0.346638924 | 5.132633123 | 0.005254 |
| Fkbp10 | 44.5591497 | 11.26451248 | 2.001835288 | 0.005681 |
| Cxcl10 | 82.6719509 | 33.93733666 | 1.291621524 | 0.005905 |
| Plau   | 74.2259494 | 27.83633588 | 1.426008251 | 0.006173 |
| Svep1  | 74.2918233 | 22.42444382 | 1.72895279  | 0.007576 |

**Supplemental Table 4: SASP genes (total 10) downregulated by sugar water-FPC diet.**

| Gene name | Average FPC | Average Chow | log2FoldChange | padj     |
|-----------|-------------|--------------|----------------|----------|
| Gstp1     | 6947.958    | 28679.46     | -2.04536       | 3.32E-28 |
| Moxd1     | 0.900777    | 2434.029     | -11.448        | 8.63E-14 |
| Ang       | 1335.433    | 3629.997     | -1.44309       | 4.01E-10 |
| Tpst1     | 185.7701    | 487.3706     | -1.39295       | 7.82E-09 |
| Rnase4    | 7450.7      | 15784.97     | -1.08321       | 3.20E-08 |
| Egfr      | 5241.006    | 10656.24     | -1.02383       | 6.64E-06 |
| Col27a1   | 454.3214    | 1071.716     | -1.23721       | 7.77E-06 |
| Calr      | 8866.376    | 17889.44     | -1.01261       | 9.79E-06 |
| Pdia6     | 3292.882    | 6943.877     | -1.07625       | 1.72E-05 |
| Il18      | 82.97418    | 179.9712     | -1.11478       | 0.0051   |

**Supplemental Table 5: SASP genes (total 36) downregulated by Activin A in MASLD liver.**

| Gene name | Average Activin A | Average Control | log2FoldChange | padj     |
|-----------|-------------------|-----------------|----------------|----------|
| Vcam1     | 417.2931671       | 841.159413      | -1.011243401   | 7.60E-09 |
| Sh3bgrl3  | 117.0377874       | 235.6662804     | -1.012490481   | 0.000697 |
| Loxl2     | 66.17225923       | 139.2697736     | -1.075003679   | 0.006248 |
| Col5a2    | 102.8901496       | 223.4092717     | -1.120734542   | 0.000918 |
| Tmsb4x    | 1612.774387       | 3527.20307      | -1.129277555   | 3.30E-11 |
| Col1a2    | 482.2575772       | 1057.312803     | -1.133074852   | 3.95E-08 |
| Spon2     | 205.0756441       | 452.4560355     | -1.14116018    | 1.31E-06 |
| Cxcl9     | 137.8850356       | 304.412979      | -1.144425051   | 4.67E-07 |
| Anxa5     | 2614.92333        | 5800.262508     | -1.14957518    | 2.08E-10 |
| Sirpa     | 402.6079643       | 996.8599099     | -1.308463305   | 1.10E-16 |
| H2ab1     | 660.1814333       | 1689.982541     | -1.356858085   | 5.86E-10 |
| Pdgfb     | 38.66689747       | 99.27246644     | -1.363977306   | 0.003998 |
| Cd44      | 139.261661        | 366.3566223     | -1.396704301   | 2.19E-09 |
| Thbs2     | 74.27705142       | 197.529454      | -1.411783953   | 7.38E-06 |
| Col3a1    | 975.369588        | 2614.424637     | -1.422838902   | 3.94E-10 |
| Cxcl10    | 33.49155963       | 89.67094817     | -1.423032707   | 0.001673 |
| S100a6    | 32.14308493       | 87.5103448      | -1.443194265   | 0.004299 |
| Col15a1   | 84.39631995       | 231.6896791     | -1.459988813   | 0.000158 |

|          |             |             |              |          |
|----------|-------------|-------------|--------------|----------|
| Col1a1   | 345.9615912 | 1018.341008 | -1.558440251 | 3.83E-10 |
| Baspl    | 37.32468792 | 110.5174034 | -1.570269247 | 0.000117 |
| Ccl5     | 18.0544141  | 57.66775372 | -1.675881374 | 0.003422 |
| Tgfb2    | 12.91523761 | 47.33219417 | -1.873879773 | 0.001973 |
| Thbs1    | 41.32513878 | 153.5953176 | -1.900417083 | 5.24E-07 |
| Esm1     | 16.24487541 | 63.82264136 | -1.981358031 | 0.005915 |
| Serpine2 | 63.6574916  | 261.9866386 | -2.040408482 | 6.37E-09 |
| Plau     | 19.33829466 | 80.49605275 | -2.067871103 | 4.37E-05 |
| Ccl2     | 11.62056252 | 49.08076539 | -2.085462099 | 0.000817 |
| Cd14     | 46.15607058 | 196.7136345 | -2.093286696 | 6.08E-12 |
| Lgals3   | 122.0374361 | 538.9037448 | -2.142686378 | 2.89E-20 |
| Spp1     | 752.115964  | 3425.759889 | -2.187408167 | 4.90E-07 |
| Il1rn    | 38.07774304 | 191.2950971 | -2.327258837 | 1.02E-13 |
| Mmp12    | 60.02813893 | 385.5829964 | -2.680626921 | 3.04E-28 |
| Plat     | 10.57092754 | 72.01913031 | -2.780099511 | 1.17E-06 |
| Mmp13    | 9.913752277 | 69.52605817 | -2.801283903 | 3.70E-07 |
| Nrg1     | 15.84272383 | 112.7297456 | -2.834278463 | 1.13E-11 |
| Mmp7     | 3.681411651 | 112.6851165 | -4.948482476 | 4.55E-05 |

**Supplemental Table 6: SASP genes (total 3) upregulated by Activin A in MASLD liver.**

| Gene name | Average Activin A | Average Control | log2FoldChange | padj     |
|-----------|-------------------|-----------------|----------------|----------|
| Inhba     | 469.2757676       | 151.394253      | 1.632273       | 4.41E-19 |
| Col27a1   | 1150.113031       | 492.628999      | 1.221222       | 4.47E-08 |
| Fst       | 202.068477        | 91.72917107     | 1.141739       | 4.55E-05 |

**Supplemental Table 7: SASP genes (total 37) downregulated by shRNA Gpnmb in MASLD liver.**

| Gene name | Average shRNA Gpnmb | Average shRNA SC | log2FoldChange | padj     |
|-----------|---------------------|------------------|----------------|----------|
| Nid1      | 472.5962            | 962.8345         | -1.02784       | 1.81E-08 |
| Sh3bgrl3  | 97.19669            | 200.3697         | -1.04495       | 1.51E-05 |
| Sparc     | 919.3429            | 1920.573         | -1.06375       | 1.65E-14 |
| Rcn3      | 75.26957            | 157.0139         | -1.06576       | 0.000152 |
| Cd14      | 71.09759            | 148.7711         | -1.07064       | 0.001238 |
| Ccdc80    | 287.047             | 609.1702         | -1.08513       | 2.20E-07 |
| Serpinh1  | 192.915             | 425.8754         | -1.14416       | 1.80E-08 |
| Plau      | 40.04156            | 88.2592          | -1.14447       | 0.006813 |
| Tnc       | 40.527              | 89.63184         | -1.15087       | 0.004766 |
| Fos       | 132.7713            | 296.9208         | -1.16407       | 4.13E-07 |
| MyI9      | 24.59059            | 60.06191         | -1.29202       | 0.00443  |
| Cxcl1     | 56.46234            | 138.4001         | -1.29322       | 1.41E-05 |
| Loxl1     | 54.09793            | 132.624          | -1.30087       | 3.64E-05 |
| Cxcl10    | 42.24393            | 104.506          | -1.31039       | 0.000391 |
| Colla2    | 481.5175            | 1195.894         | -1.31316       | 0.001402 |

|         |          |          |          |          |
|---------|----------|----------|----------|----------|
| S100a11 | 236.5751 | 592.3199 | -1.32505 | 2.45E-08 |
| Il1a    | 39.3691  | 99.41484 | -1.34139 | 0.000354 |
| Selplg  | 43.69099 | 112.8276 | -1.36624 | 0.000371 |
| Sirpa   | 439.2057 | 1143.509 | -1.38199 | 1.35E-12 |
| Hexb    | 131.0811 | 343.167  | -1.38908 | 1.80E-13 |
| Cx3cl1  | 20.64087 | 55.24197 | -1.40896 | 0.005518 |
| Col3a1  | 933.3454 | 2612.429 | -1.48529 | 0.000268 |
| Col5a2  | 80.73557 | 231.7103 | -1.52671 | 4.80E-09 |
| Baspl   | 30.23226 | 87.2495  | -1.53061 | 0.000206 |
| H2ab1   | 465.9999 | 1380.416 | -1.56552 | 1.06E-21 |
| Lox     | 12.37235 | 36.74071 | -1.5789  | 0.008647 |
| Anxa2   | 544.8601 | 1703.405 | -1.64501 | 2.32E-05 |
| Il15    | 15.24875 | 49.47425 | -1.69537 | 0.00109  |
| Colla1  | 384.5046 | 1281.597 | -1.73762 | 2.10E-05 |
| Lgals1  | 389.1031 | 1319.951 | -1.76396 | 4.02E-35 |
| Ccl2    | 13.80527 | 51.40555 | -1.90092 | 0.00051  |
| Nrg1    | 20.27071 | 90.5726  | -2.16954 | 5.44E-05 |
| Lgals3  | 94.81971 | 503.9981 | -2.41549 | 3.13E-21 |
| Mmp12   | 65.20975 | 481.6603 | -2.88743 | 9.73E-05 |
| Timp1   | 1.996592 | 35.34102 | -4.19667 | 9.25E-06 |
| Fgf9    | 0.418562 | 10.91781 | -4.73104 | 0.009037 |
| Ccl7    | 0.360675 | 15.70682 | -5.25364 | 0.001787 |

**Supplemental Table 8: SASP genes (total 4) upregulated by shRNA Gpnmb in MASLD liver.**

| Gene name | Average shRNA Gpnmb | Average shRNA SC | log2FoldChange | padj     |
|-----------|---------------------|------------------|----------------|----------|
| Moxd1     | 167.7157            | 1.486805502      | 6.825857       | 0.009535 |
| Igfbp1    | 5376.65             | 1178.326953      | 2.189598       | 7.35E-58 |
| Gstp1     | 16079.25            | 5868.613057      | 1.454236       | 2.04E-42 |
| Egfr      | 7794.302            | 3371.568682      | 1.209055       | 0.000228 |

**Supplemental Table 9: SASP genes (total 15) upregulated by sugar water-FPC diet and downregulated by Activin A and shRNA Gpnmb in MASLD liver.**

| Gene name | FPC vs chow<br>log2FoldChange | FPC vs chow<br>padj | Activin A vs control<br>log2FoldChange | Activin A vs<br>control padj | shRNA Gpnmb vs<br>shRNA SC<br>log2FoldChange | shRNA Gpnmb vs<br>shRNA SC padj |
|-----------|-------------------------------|---------------------|----------------------------------------|------------------------------|----------------------------------------------|---------------------------------|
| Baspl     | 2.156644543                   | 1.59E-05            | -1.57027                               | 0.000117                     | -1.53061                                     | 0.000206                        |
| Ccl2      | 3.037914429                   | 2.69E-05            | -2.08546                               | 0.000817                     | -1.90092                                     | 0.00051                         |
| Cd14      | 1.915839722                   | 1.06E-06            | -2.09329                               | 6.08E-12                     | -1.07064                                     | 0.001238                        |
| Colla1    | 2.627480957                   | 1.80E-20            | -1.55844                               | 3.83E-10                     | -1.73762                                     | 2.10E-05                        |
| Colla2    | 2.098430678                   | 4.77E-16            | -1.13307                               | 3.95E-08                     | -1.31316                                     | 0.001402                        |
| Col3a1    | 2.084945518                   | 7.15E-16            | -1.42284                               | 3.94E-10                     | -1.48529                                     | 0.000268                        |
| Col5a2    | 1.737153914                   | 4.14E-05            | -1.12073                               | 0.000918                     | -1.52671                                     | 4.80E-09                        |
| Cxcl10    | 1.291621524                   | 0.005905            | -1.42303                               | 0.001673                     | -1.31039                                     | 0.000391                        |
| H2ab1     | 2.082620886                   | 7.14E-17            | -1.35686                               | 5.86E-10                     | -1.56552                                     | 1.06E-21                        |

|          |             |          |          |          |          |          |
|----------|-------------|----------|----------|----------|----------|----------|
| Lgals3   | 3.609664214 | 1.55E-33 | -2.14269 | 2.89E-20 | -2.41549 | 3.13E-21 |
| Mmp12    | 7.247920265 | 6.56E-27 | -2.68063 | 3.04E-28 | -2.88743 | 9.73E-05 |
| Nrg1     | 3.879501289 | 1.29E-12 | -2.83428 | 1.13E-11 | -2.16954 | 5.44E-05 |
| Plau     | 1.426008251 | 0.006173 | -2.06787 | 4.37E-05 | -1.14447 | 0.006813 |
| Sh3bgrl3 | 1.196575602 | 0.000598 | -1.01249 | 0.000697 | -1.04495 | 1.51E-05 |
| Sirpa    | 2.221002503 | 1.47E-24 | -1.30846 | 1.10E-16 | -1.38199 | 1.35E-12 |
