# Supplementary material
Source: publisher figshare collection journal article supplement (https://diabetesjournals.figshare.com/articles/dataset/_/24449683)
Supplement: Supplementary file 3 [file 1]

## **SUPPLEMENTAL MATERIAL**

### **Roles of Activin A and Gpnmb in metabolic dysfunction-associated steatotic liver disease (MASLD)**

Huan Liu<sup>1,2</sup>, Armen Yerevanian<sup>3</sup>, Maria Westerhoff<sup>4</sup>, Margaret H. Hastings<sup>1,2</sup>,  
Justin Ralph Baldovino Guerra<sup>1,2</sup>, Meng Zhao<sup>5,6,7</sup>, Katrin J. Svensson<sup>5,6,7</sup>, Bishuang Cai<sup>8</sup>  
Alexander A. Soukas<sup>3</sup>, Anthony Rosenzweig<sup>1,2\*</sup>

<sup>1</sup>Cardiovascular Research Center, Massachusetts General Hospital, and Harvard Medical School, Boston, MA, 02114, USA.

<sup>2</sup>Institute for Heart and Brain Health, University of Michigan Medical Center, Ann Arbor, MI, 48109, USA.

<sup>3</sup>Department of Medicine, Diabetes Unit and Center for Genomic Medicine, Massachusetts General Hospital, and Harvard Medical School, Boston, MA, 02114, USA.

<sup>4</sup>Department of Pathology, University of Michigan, Ann Arbor, MI, 48109, USA.

<sup>5</sup>Department of Pathology, Stanford University School of Medicine, Stanford, CA 94305, USA.

<sup>6</sup>Stanford Diabetes Research Center, Stanford University School of Medicine, Stanford, CA 94305, USA

<sup>7</sup>Stanford Cardiovascular Institute, Stanford University School of Medicine, CA 94305, USA

<sup>8</sup>Division of Liver Diseases, Department of Medicine, Icahn School of Medicine at Mount Sinai, New York, NY 10029, USA.

\*Correspondence: Anthony Rosenzweig, MD, Institute for Heart and Brain Health, University of Michigan Medical Center, North Campus Research Complex, 2800 Plymouth Road, 2791(3)/Bldg 25 NCRC Ann Arbor, MI 48109. Email anthros@med.umich.edu.

## **Detailed Research Methods**

### **AAV Production**

AAV production, purification and titration were performed as described (1). Briefly, HEK293 cells were transfected with p $\Delta$ F6 (Addgene Plasmid #112867), pAAV2/8 (Addgene Plasmid #112864) helper plasmids and AAV8-TBG-GFP or AAV8-TBG-Activin A or AAV8-shRNA Scramble (SC) or AAV8-shRNA-Gpnmb transfer plasmids by PEI. Viruses were purified using iodixanol gradient ultracentrifugation using OptiPrep™ Density Gradient Medium (Sigma D1556), concentrated with columns (Fisher scientific UFC910024), and titrated using droplet digital PCR.

### **Cell culture**

Hepa 1-6 cells (ATCC), L929 cells (ATCC) and BMDM cells were prepared and cultured as previously described (1). Hepa 1-6 cells (ATCC, CRL1830, lot#70031235) were cultured in DMEM medium (Gibco) supplemented with 10% FBS (Gibco) and 50  $\mu$ g/ml Penicillin/ Streptomycin (Gibco). L929 cells (ATCC, CCL-1, lot# 70026472) were cultured in RPMI1640 medium (Gibco) supplemented with 10% FBS (Gibco) and 50  $\mu$ g/ml Penicillin/ Streptomycin (Gibco). BMDMs were isolated from mice bone marrow and cultured in RPMI1640 medium supplemented with 10% FBS (Gibco), 50  $\mu$ g/ml Penicillin/ Streptomycin (Gibco) and 30% L929 conditioned medium for 7 days to induce differentiation. For the hepatic Activin A conditioned media treatment, Hepa 1-6 cells were transfected with TBG-GFP or TBG-Activin A plasmid by Lipofectamine 3000 (Thermo Fisher Scientific) or siRNA Activin A by Lipofectamine RNAiMax (Thermo Fisher Scientific) at 37°C for 48h. The conditioned media were collected and filtered with a 0.22  $\mu$ m filter, diluted twice with fresh RPMI1640 medium supplemented with 10% FBS (Gibco), 50  $\mu$ g/ml Penicillin/ Streptomycin (Gibco), with 10  $\mu$ g/ml oxLDL and 1 $\mu$ g/mL Mouse IgG1 Isotype Control or neutralizing anti-Activin A antibody for 24 hours and then added into

mature PBS washed BMDM cells For the recombinant Activin A protein treatment, BMDMs were treated with or without 20ng/ml, 50ng/ml or 100ng/ml Activin A protein, with or without 100 ng/ml LPS and 50ng/ml IFN- $\gamma$ , with or without 200  $\mu$ M Palmitic acid, 100  $\mu$ M cholesterol, or 30  $\mu$ M Oleic acid for 24 hours.

### **Animal studies**

Only males were used because males have more marked metabolic changes on FPC diet than females. 8-10 week-old male C57BL/6J mice (Jackson Laboratory) were injected via tail vein with AAV8-TBG-GFP or AAV8-TBG-Activin A ( $2 \times 10^{10}$  genome copies/mouse), or AAV8-H1-scramble control or AAV8-H1-shRNA Activin A or AAV8-H1-shRNA Gpnmb viruses ( $2 \times 10^{11}$  genome copies/mouse), and then fed FPC diet (Envigo) and sugar water containing 23.1g/L fructose and 18.9g/L glucose for 16 weeks as described (2). Diet and sugar water were refilled twice weekly. Body weight, food weight/cage and water volume/bottle were measured weekly. Mice were sacrificed 16 weeks after treatment unless otherwise indicated.

### **Blood/ Plasma Analyses**

Fasting blood glucose was measured using a glucometer (Clarity) in mice after fasting for 5hrs with free access to water. Overnight fasting plasma was collected in 5 mM EDTA. Plasma Activin A and FST ELISA Kit (R&D) and Plasma ALT and AST/Got (Teco Diagnostics) were analyzed according to manufacturer's instructions.

### **Glucose tolerance and insulin resistance**

Mice were fasted overnight (glucose tolerance) or for 5h (insulin resistance) and then injected intraperitoneally with 2g/kg d-glucose (Sigma) or 0.5 U/kg insulin (Sigma) for glucose and insulin

tolerance testing, respectively. Blood glucose was measured by glucometer before, 15, 30, 60, 90 and 120 min after.

### **Quantitative RT-PCR**

Total RNA was extracted from liver using Trizol (Thermo Fisher Scientific)/chloroform/isopropyl alcohol. cDNA was synthesized using PrimeScript RT Master Mix (Takara) and subjected to RT-PCR with SYBR Green (Applied Biosystems). Relative mRNA abundance was calculated by normalization to hypoxanthine phosphoribosyltransferase 1 (HPRT) mRNA. For RT-PCR primers, see Supplemental Table 2.

### **Immunoblotting**

Liver protein was extracted using RIPA/SDS buffer (Thermo Fisher Scientific, #89900), and protein concentration was quantified by a BCA assay (Thermo Fisher Scientific, #23227). Proteins were resolved by electrophoresis on 4-20% Tris gels (Bio-Rad) and transferred to PVDF membranes (Millipore Sigma). Membranes were blocked for 1hr at room temperature in Tris-buffered saline and 0.1% Tween 20 (TBST) containing 5% (wt/vol) nonfat milk and incubated with primary antibodies in the same buffer at 4°C overnight, using 1:1000 dilution. Antibodies used in this paper are listed in Supplemental Table 1. Image Studio was used for quantification.

### **Liver senescent cells staining**

Liver senescent cells were stained by Senescence Cells Histochemical Staining Kit (Sigma) using frozen section according to manufacturer's instructions at 37 °C overnight.  $\beta$ -gal+ cells were imaged by Keyence and quantified using Image J at the same setting.

### **Flow cytometry**

Flow cytometry was performed blindly by authors with a flow core technician as described (1). Livers were excised after PBS (Thermo Fisher Scientific) perfusion, minced, and digested with 450Uml/L collagenase I (Worthington Biochemical), 125Uml/L collagenase XI, 60Uml/L DNase I and 60Uml/L hyaluronidase (Sigma-Aldrich) in PBS at 37°C for 20 min, and then passed through a 70µm-filter. Red blood cells were lysed with RBC lysis buffer. Total viable cell numbers were counted using counting beads (Thermo Fisher Scientific). Single-cell suspensions were stained in PBS supplemented with 2% FBS and 0.5% BSA. DAPI was used for staining live/dead cells. Monoclonal antibodies used for flow cytometry are listed in the Supplemental Table 1.

Liver immune cells were defined as described (4): PMN (polymorphonuclear cells, CD45+CD11b+Ly-6G+, including neutrophils, basophils, and mast cells), PMO (patrolling monocytes, CD45+CD11b+Ly-6G-Ly-6C<sup>-</sup> MHC-II<sup>-</sup>), MDM (monocytes-derived macrophages, CD45+CD11b+Ly-6G-Ly-6C<sup>high</sup> MHC-II<sup>high</sup>), MM (mature macrophages, also known as Kupffer cells, CD45+CD11b+Ly-6G-Ly-6C<sup>neg/low</sup> MHC-II<sup>high</sup>), ED (eosinophils, CD45+CD11b+Ly-6G-Ly-6C<sup>low</sup> MHCII<sup>-</sup>), Ly-6C<sup>high</sup> monocytes (CD45+CD11b+Ly-6G-Ly-6C<sup>high</sup> MHCII<sup>-</sup>).

### **RNA-seq and Bioinformatic Analyses**

Total RNA was isolated from liver using Trizol (Thermo Fisher Scientific)/chloroform/isopropyl alcohol. RNA-sequencing was performed using NovaSeq6000 as described (1). Differential gene expression was analyzed and normalized with R package DESeq2. Count cut off: mean normalized count  $\geq 10$  in  $\geq 1$  group. Genes with adjusted p-value (padj)  $< 0.05$ . Significant upregulation:  $\log_2\text{FoldChange} \geq 1$ , padj  $< 0.01$ . Significant downregulation:  $\log_2\text{FoldChange} \leq -1$ , padj  $< 0.01$ . Else is considered stable. Heatmap z-scaled ( $\log_{10}(\text{normalized count} + 0.05)$ ) and Principal Components Analysis (PCA) scaled ( $\log_{10}(\text{RNA-}$

seq Matrix + 0.01) were used. R-packages are listed in the Supplemental Table 1. RNA-seq raw data are available in GEO (accession number GSE221443).
